# Supplementary material for: LncRNA 220: A Novel Long Non-Coding RNA Regulates Autophagy and Apoptosis in Kupffer Cells via the miR-5101/PI3K/AKT/mTOR Axis in LPS-Induced Endotoxemic Liver Injury in Mice
Source: MDPI journal article supplement (doi:10.3390/ijms241311210), 2023-07-07

**Figure 1A**

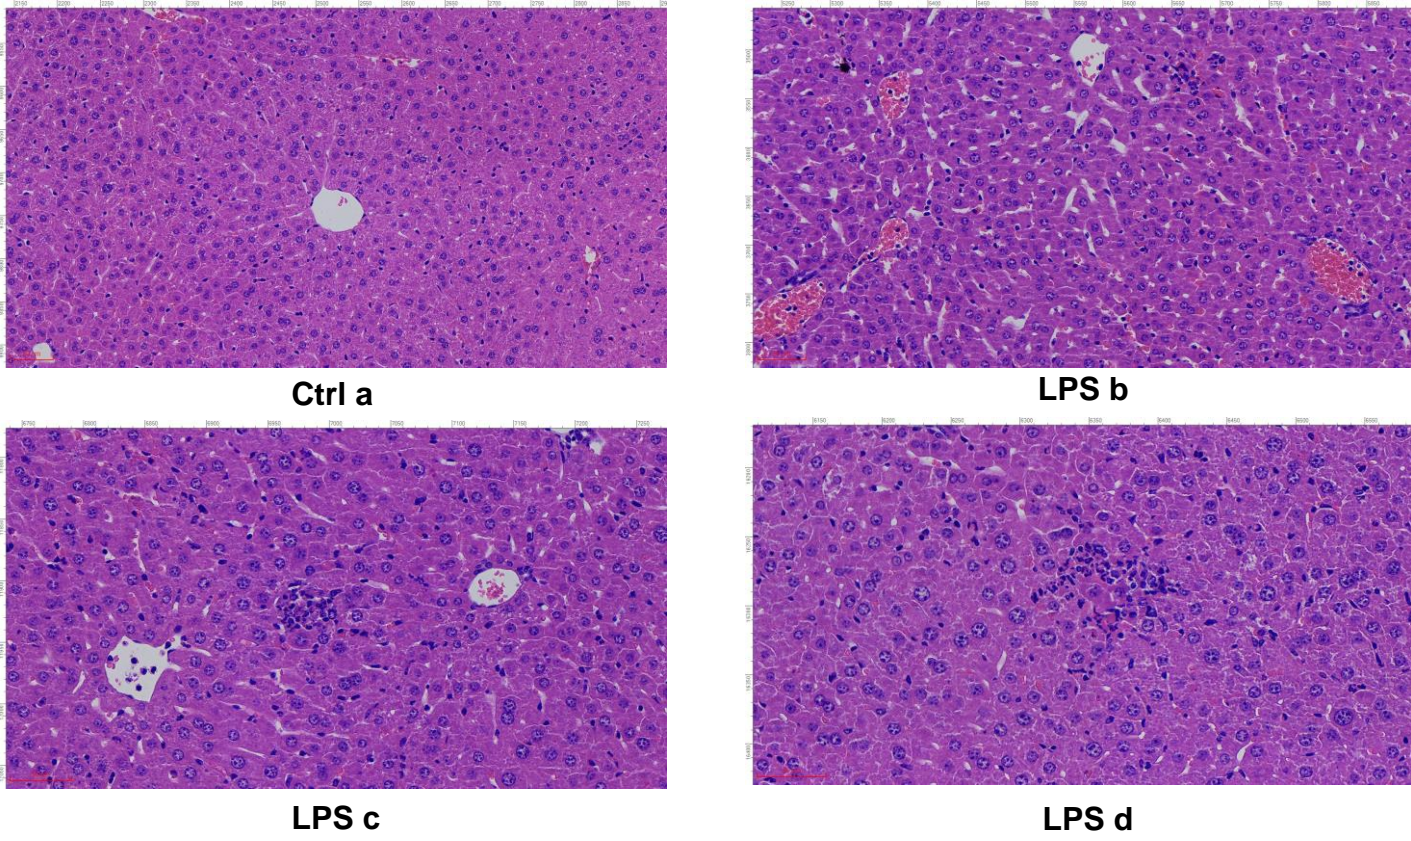

**Figure 2A**

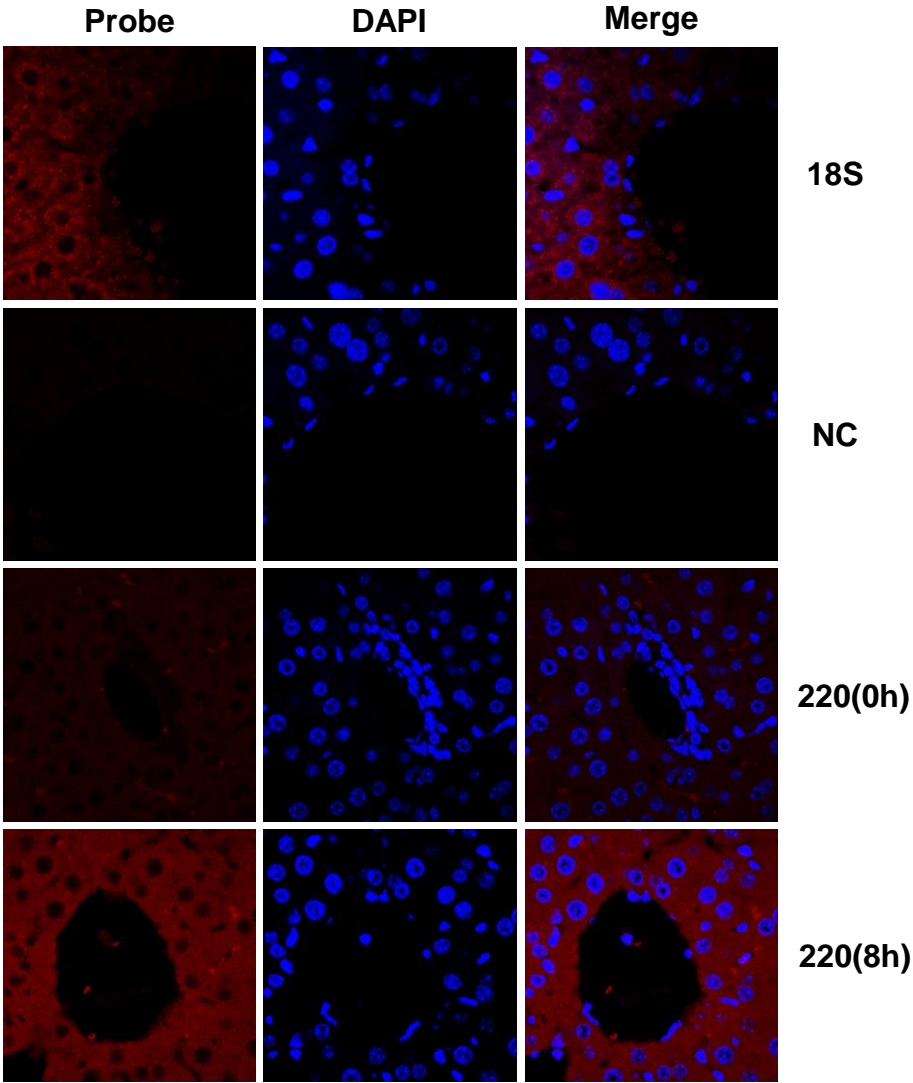

Figure 2F

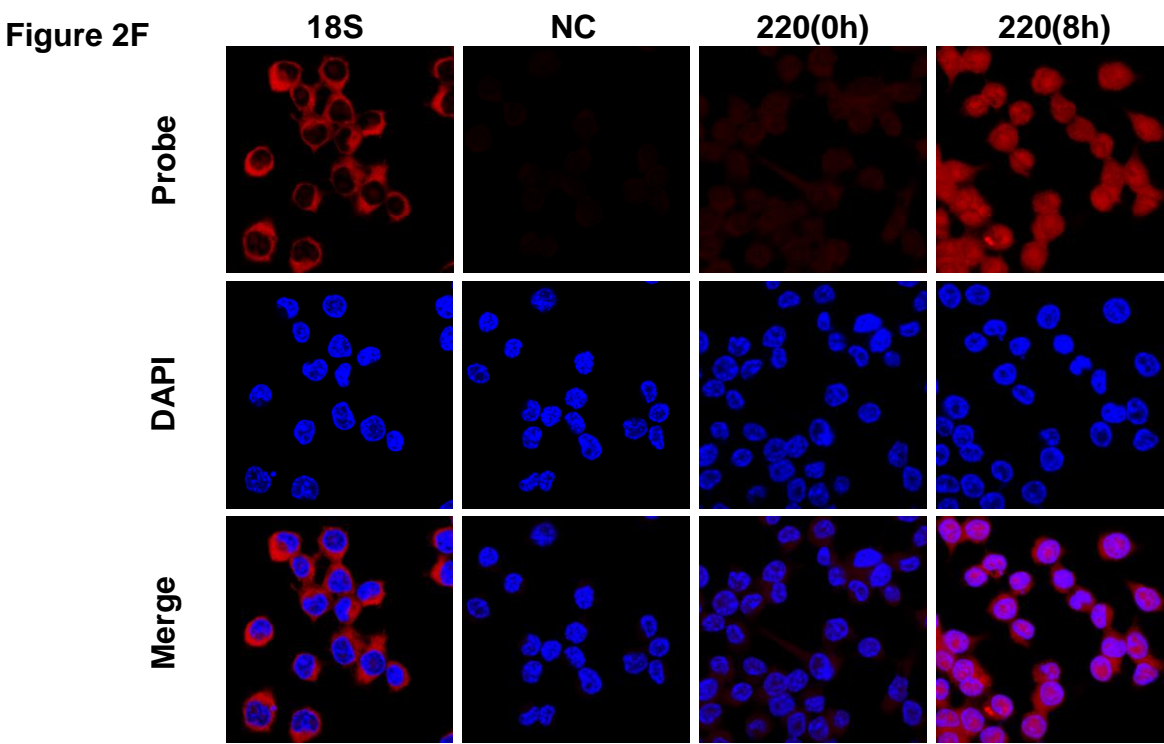

Figure 5A

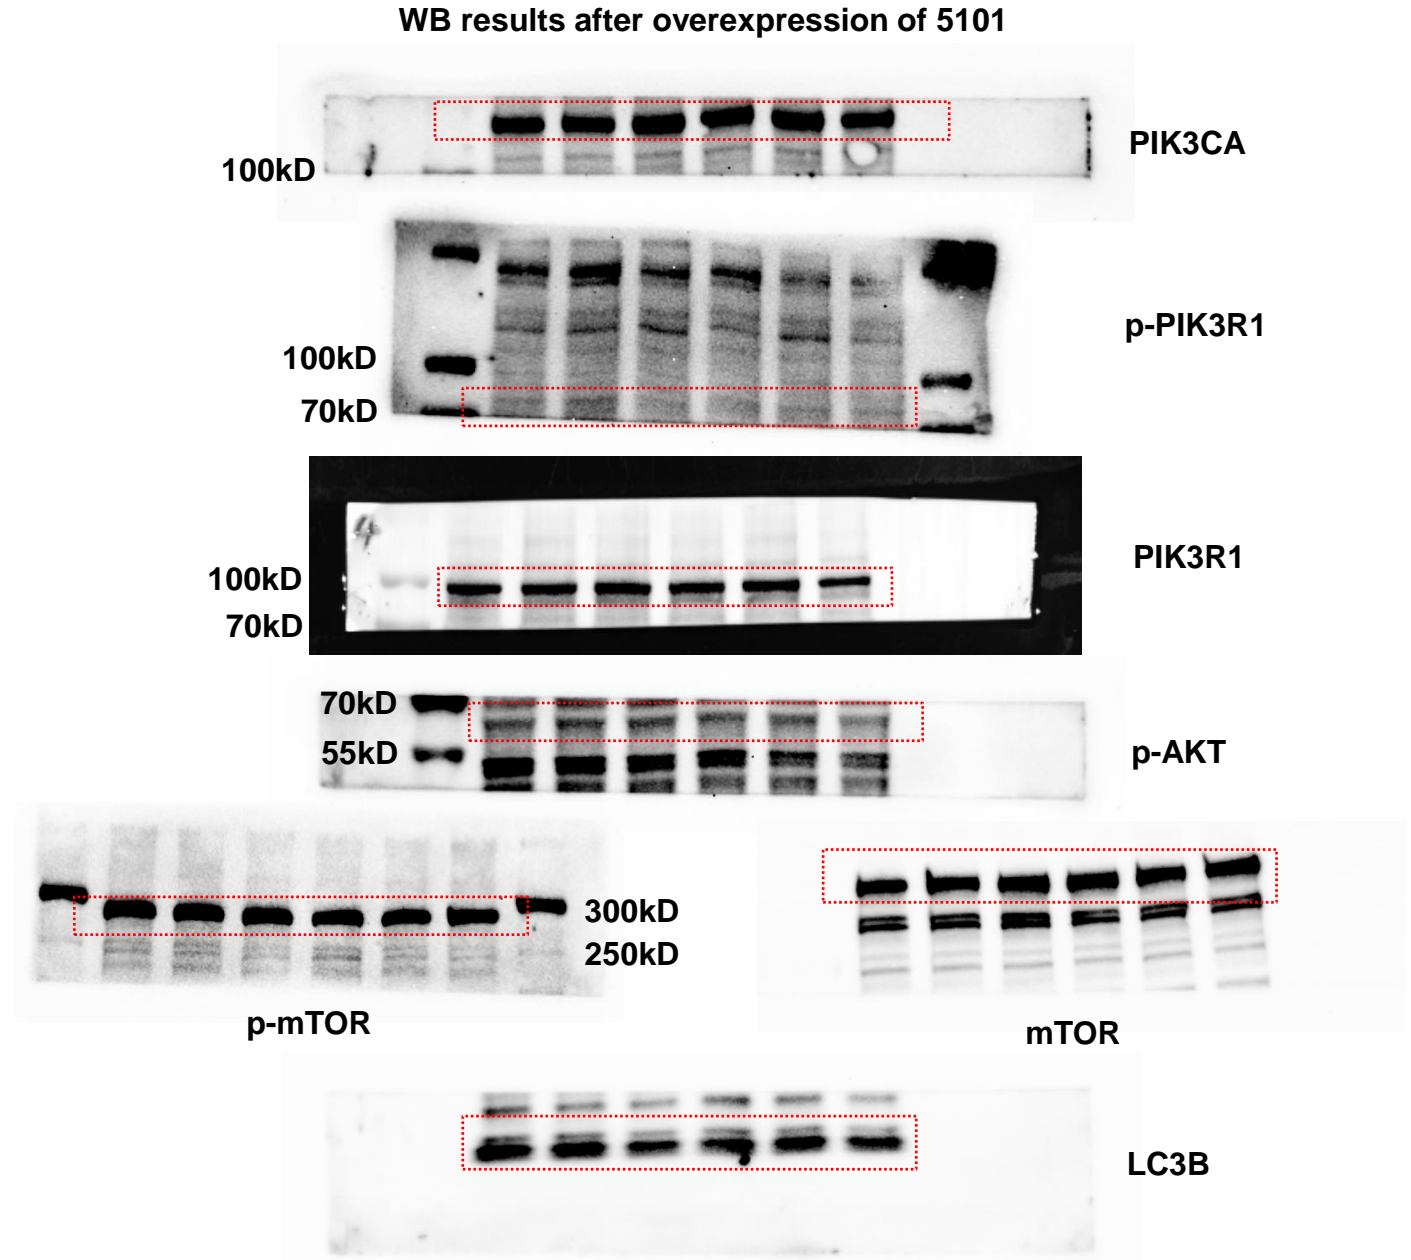



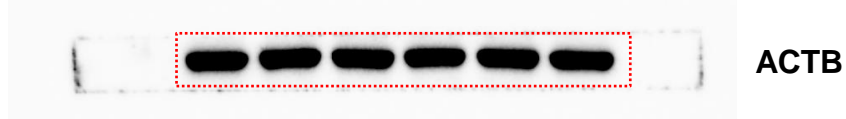

Figure 5C

WB results after knockdown of 5101

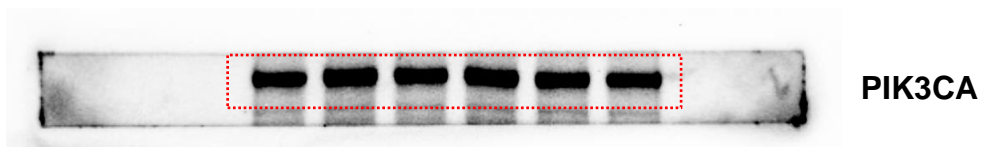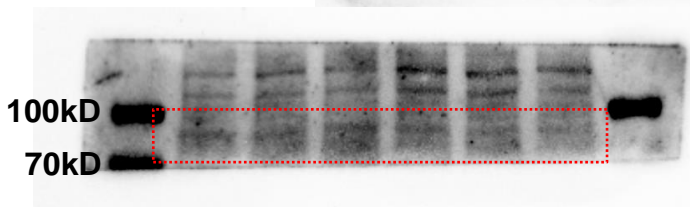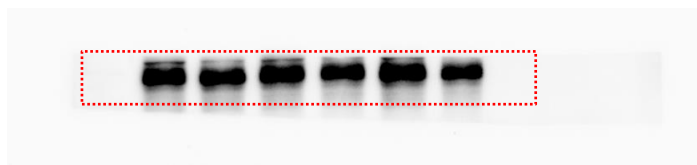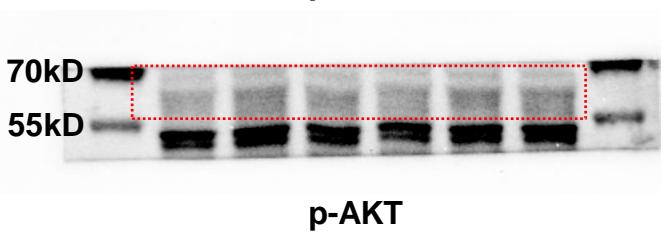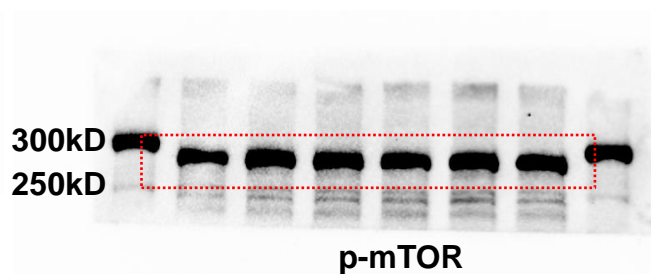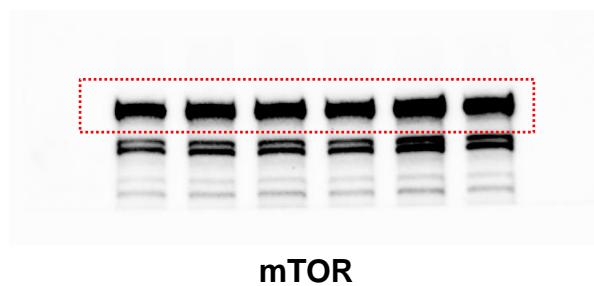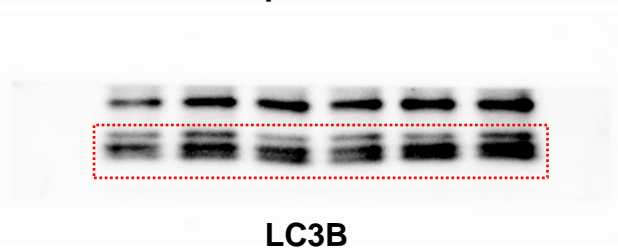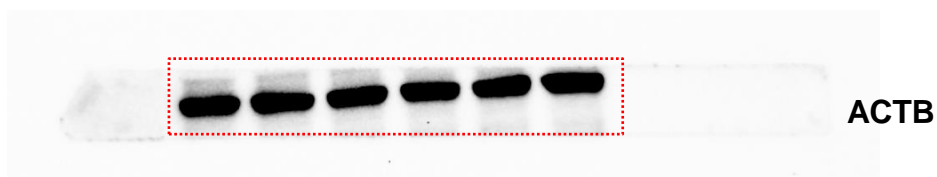

Figure 5E

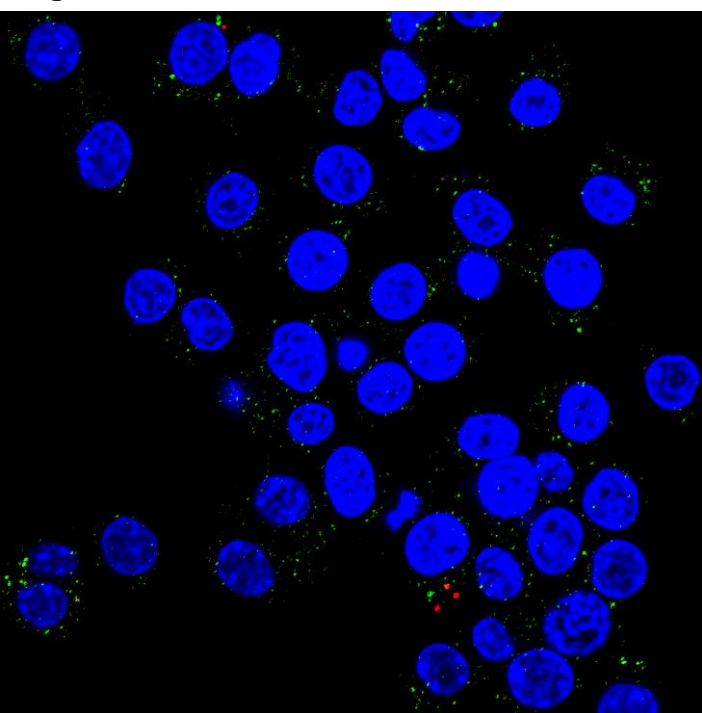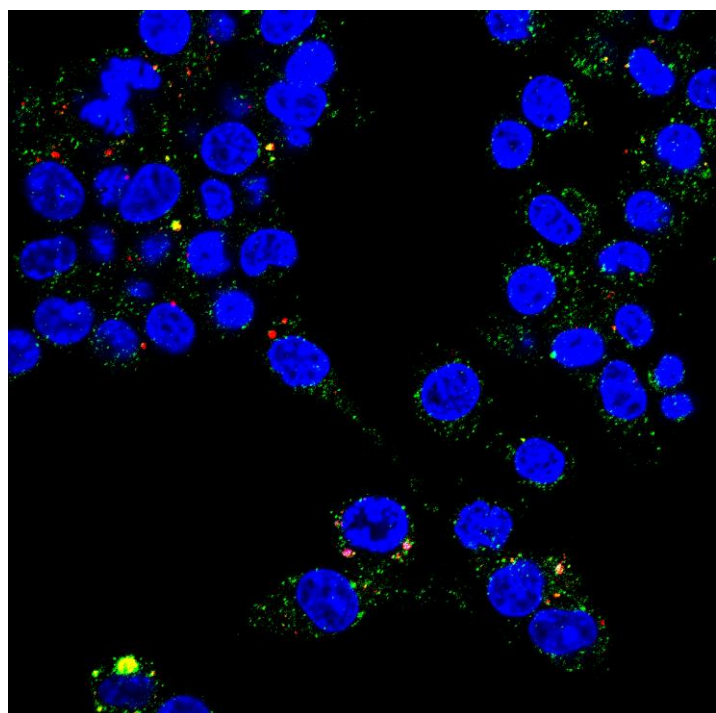

Ctrl

LPS

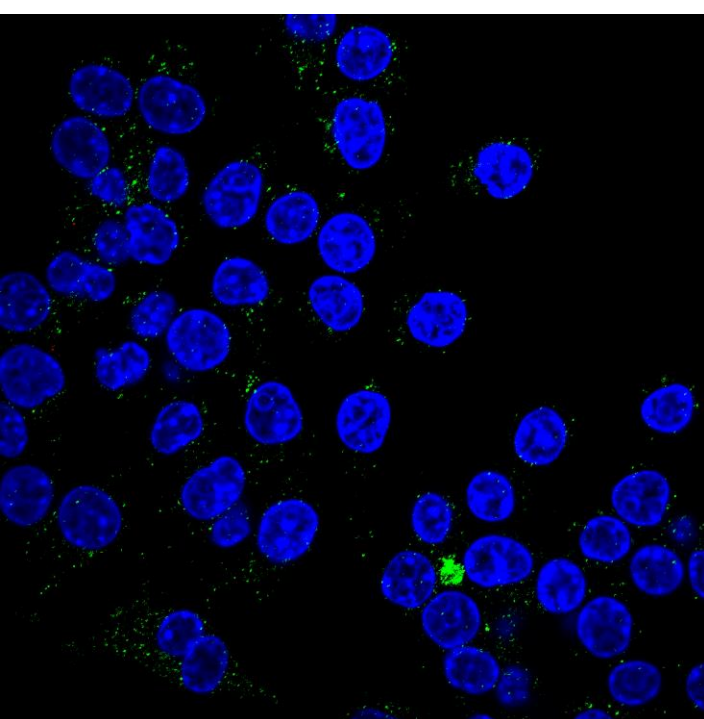

**MiR-NC+LPS**

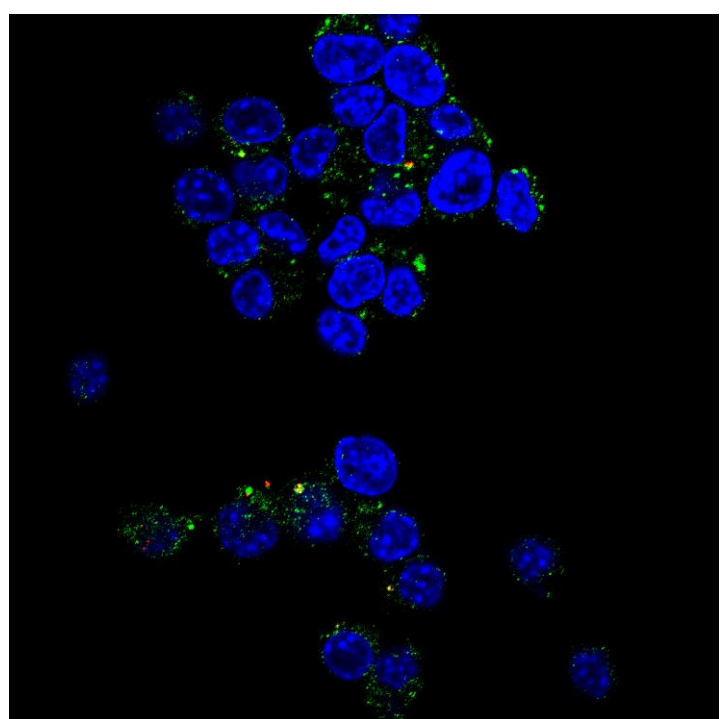

**MiR-5101+LPS**

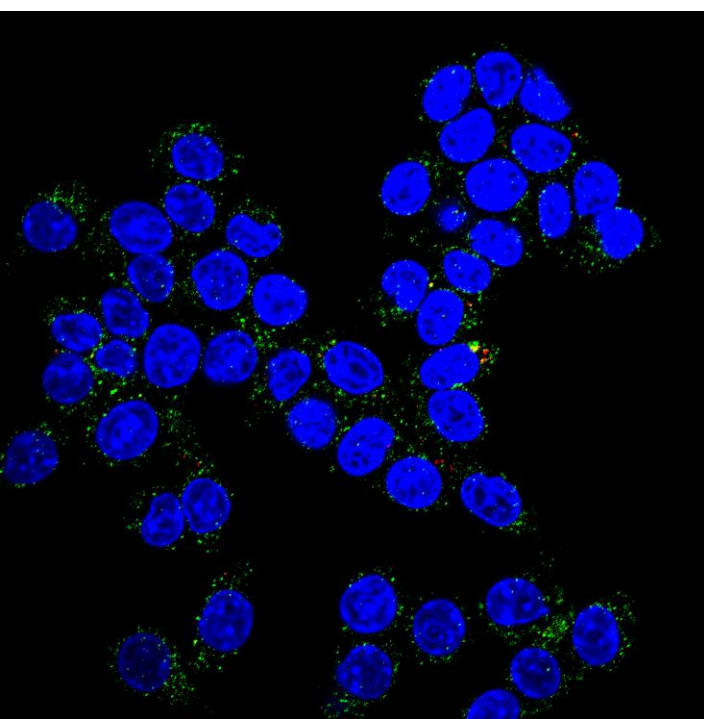

**Anti-NC+LPS**

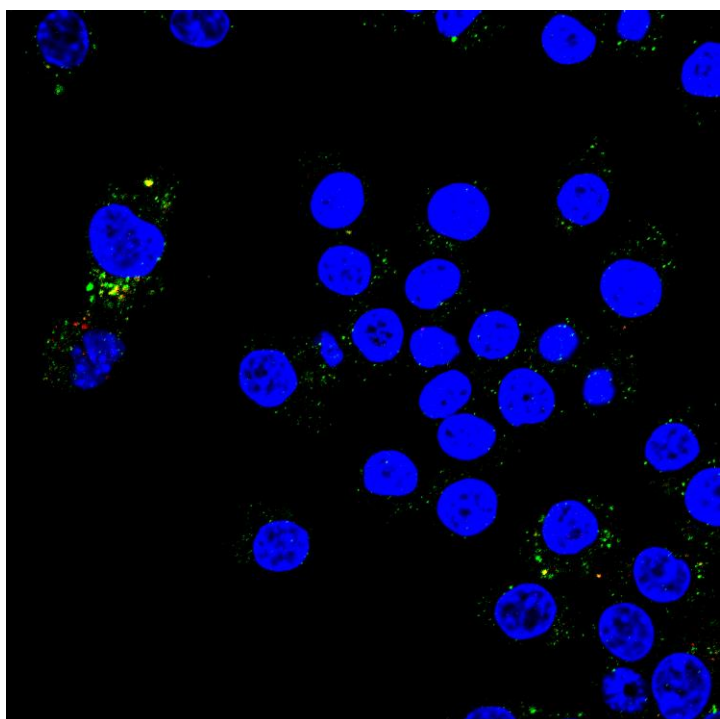

**Anti-miR-5101+LPS**

**Figure 6A**

**WB results after overexpression of 5101**

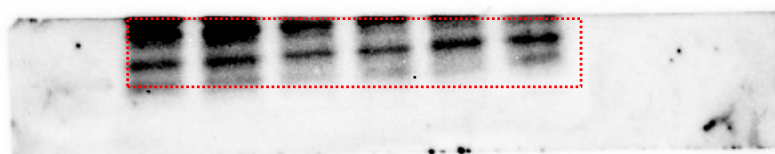

**Cleaved-CASP3**

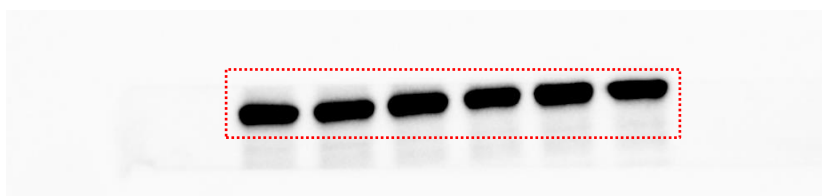

**CASP3**

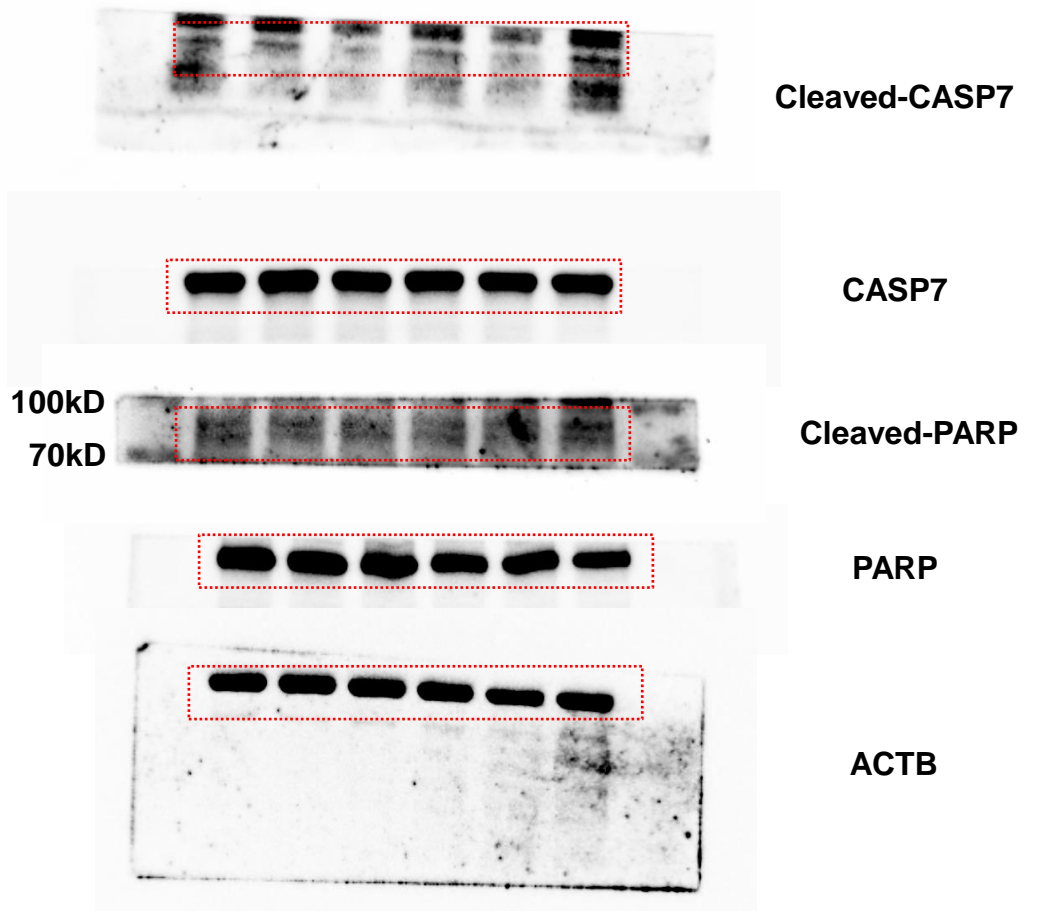

**Figure 6C**

**WB results after knockdown of 5101**

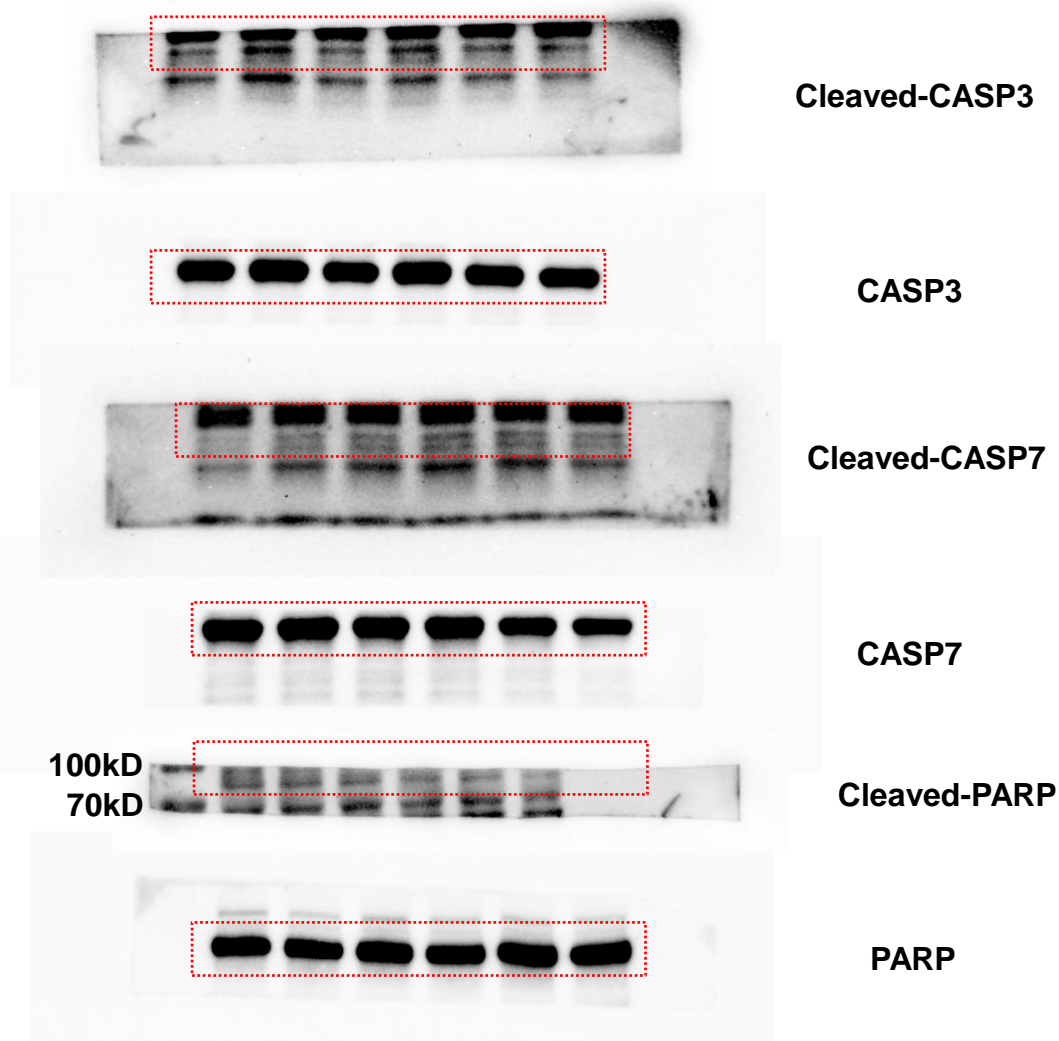



**Figure 6E**

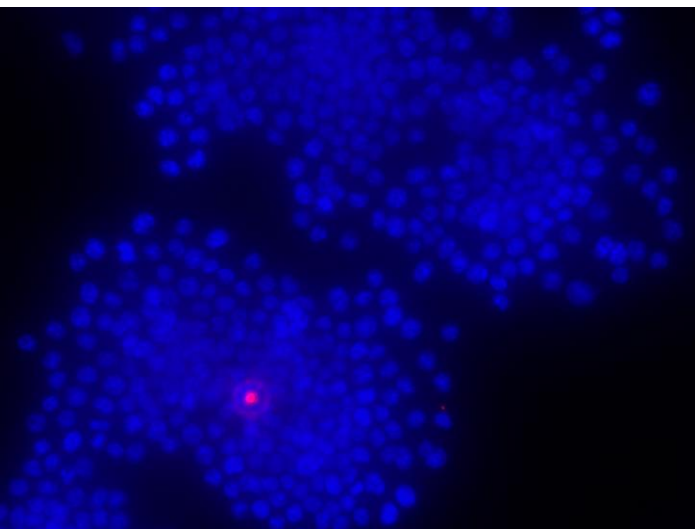

**Ctrl**

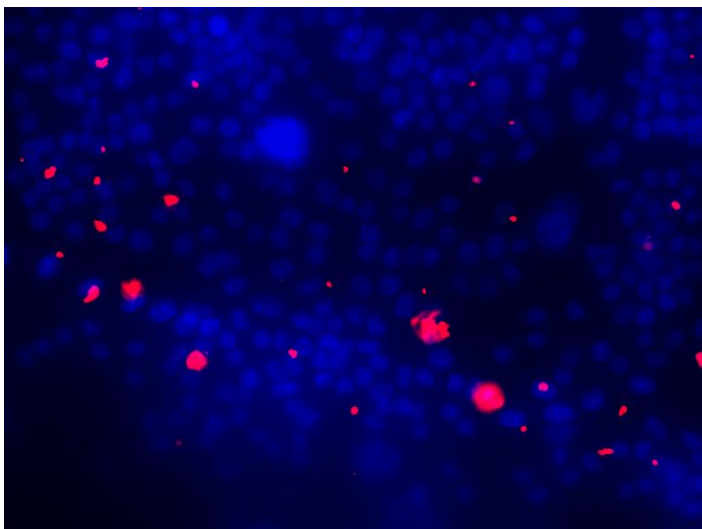

**LPS**

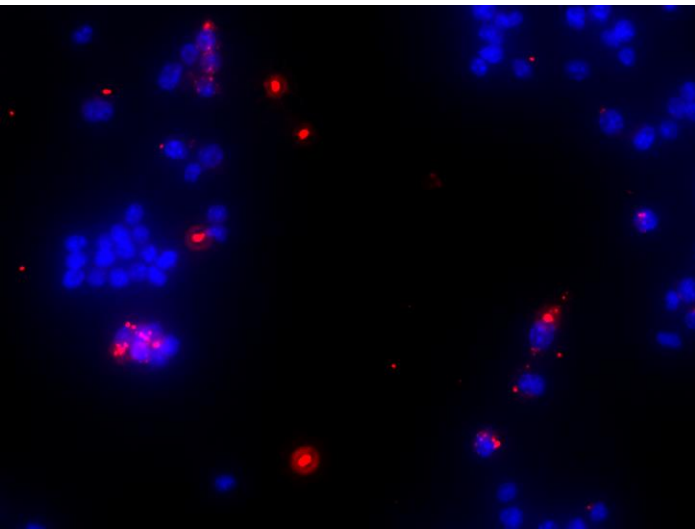

**MiR-NC+LPS**

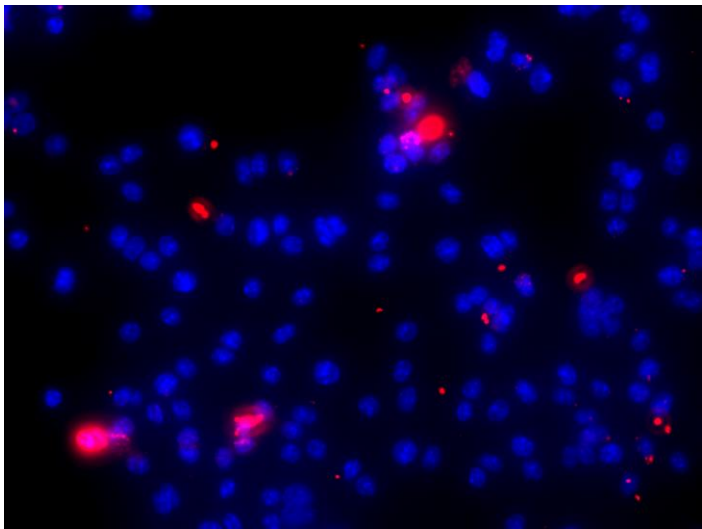

**MiR-5101+LPS**

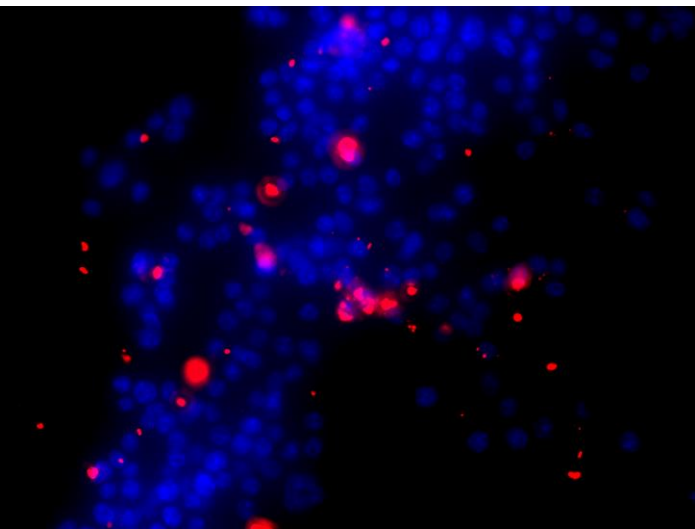

**Anti-NC+LPS**

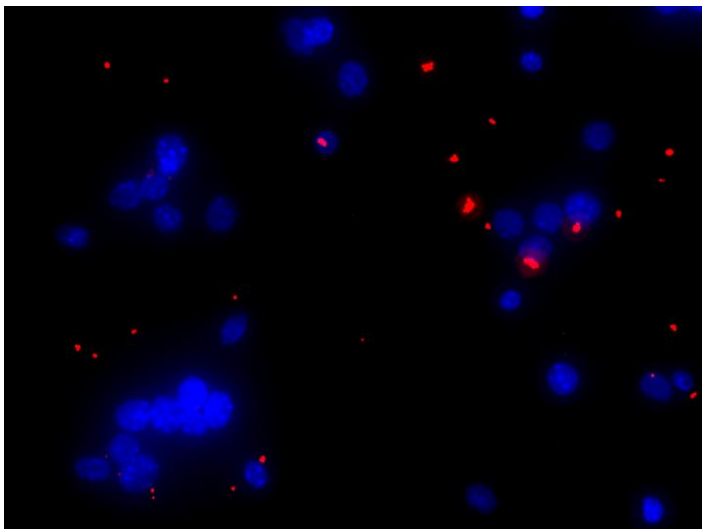

**Anti-miR-5101+LPS**

**Figure 6G**

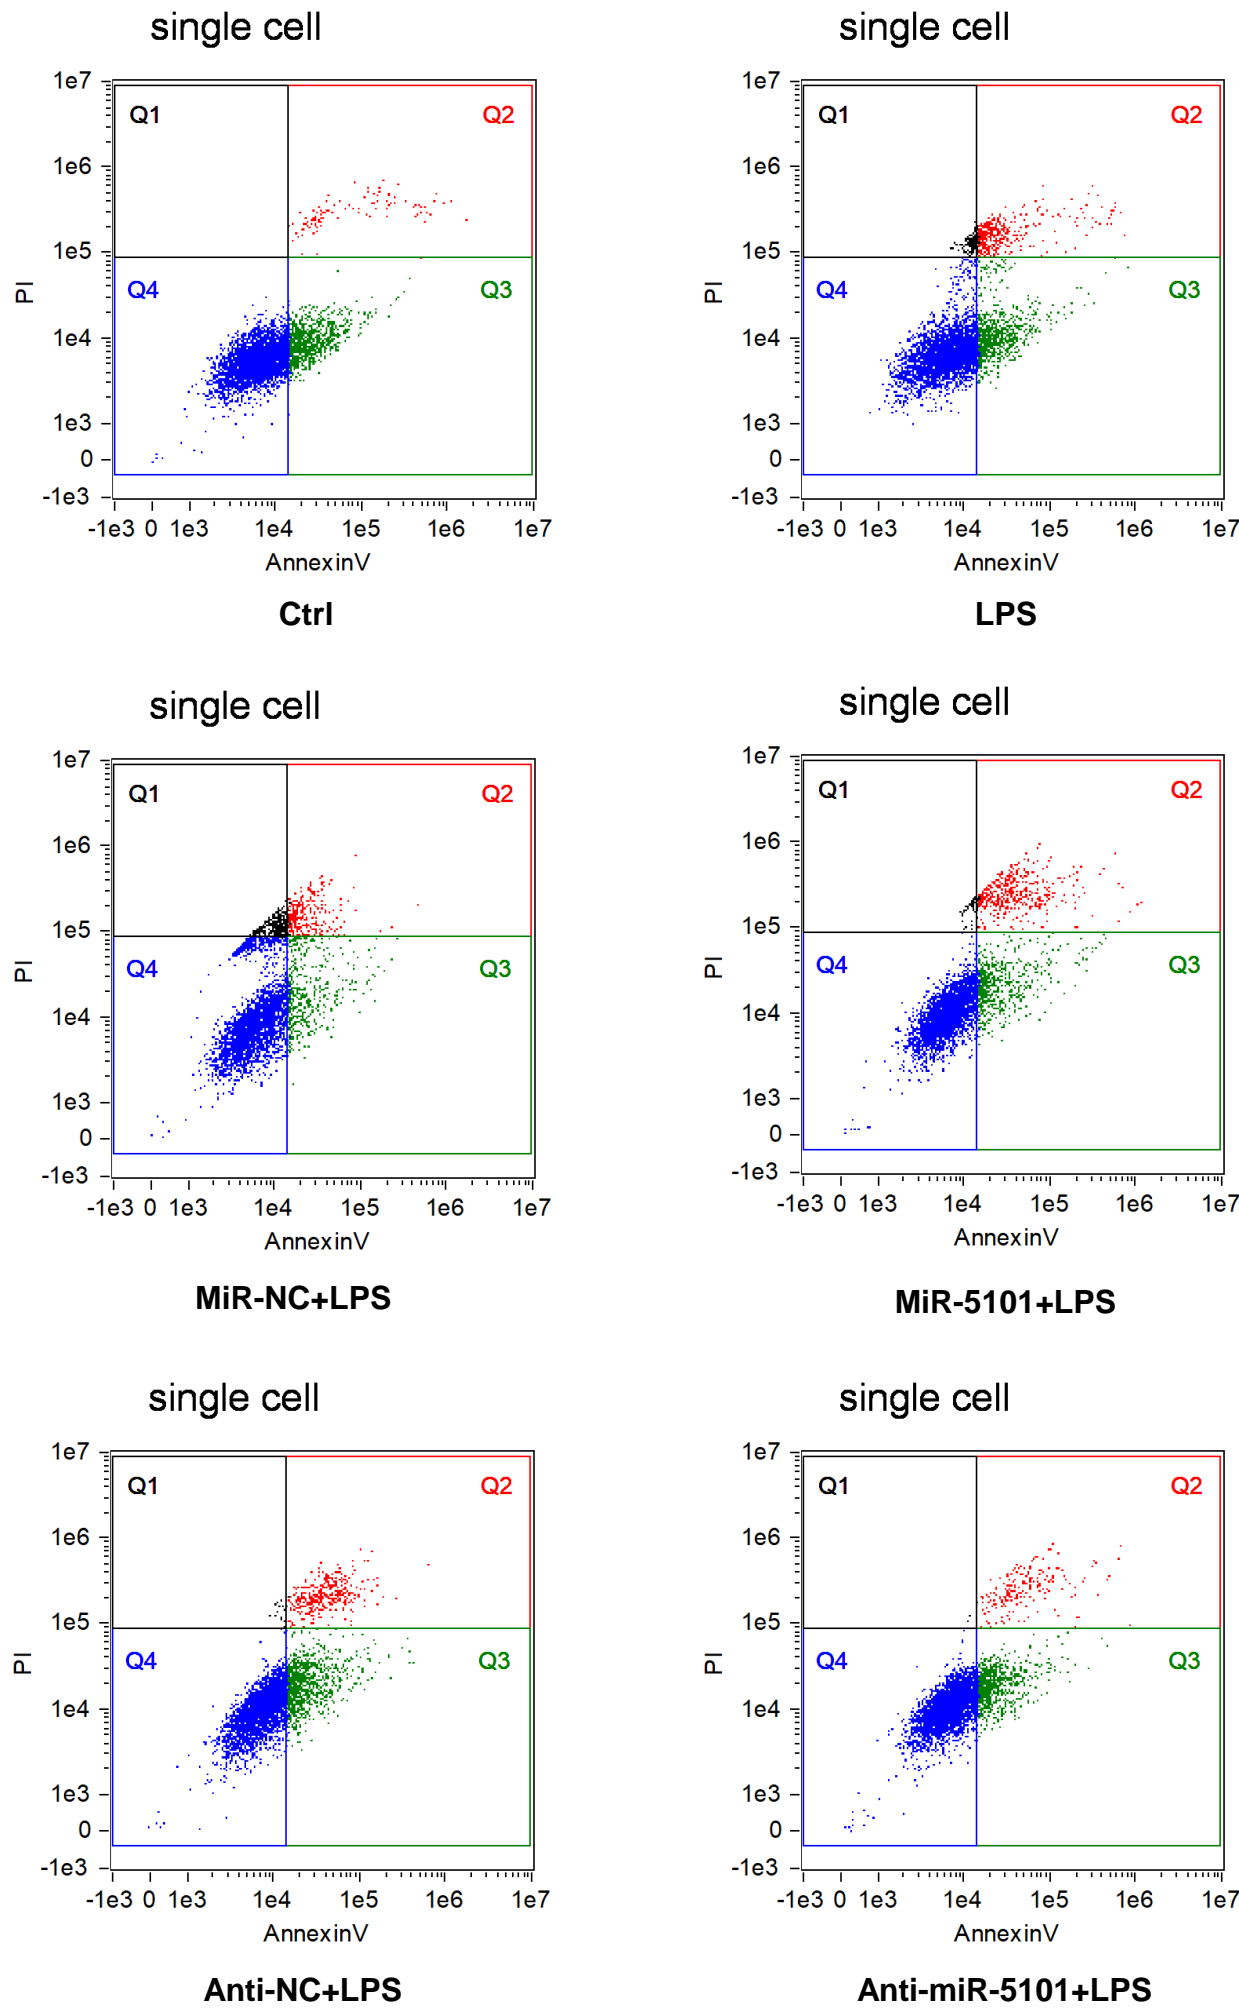

Figure S2B

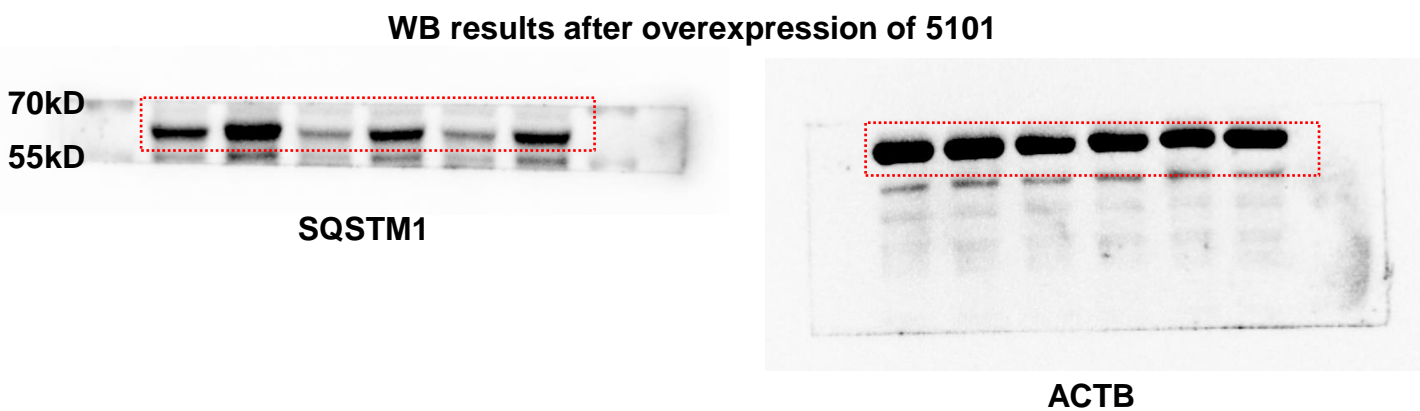

Figure S2D

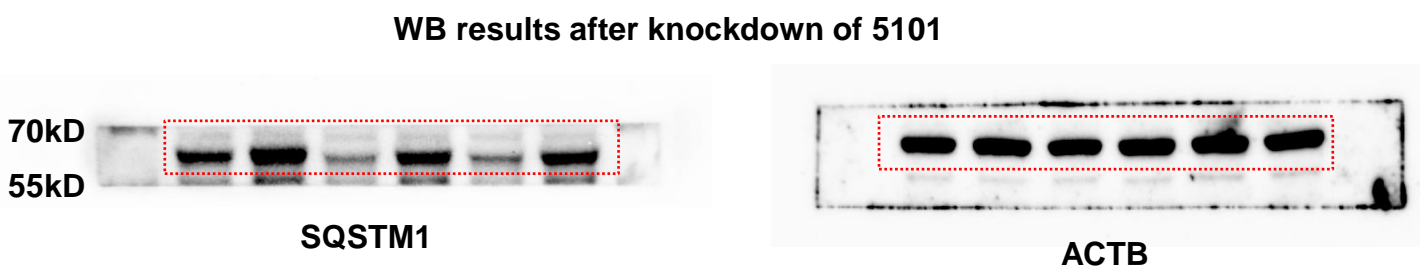

Figure S2F

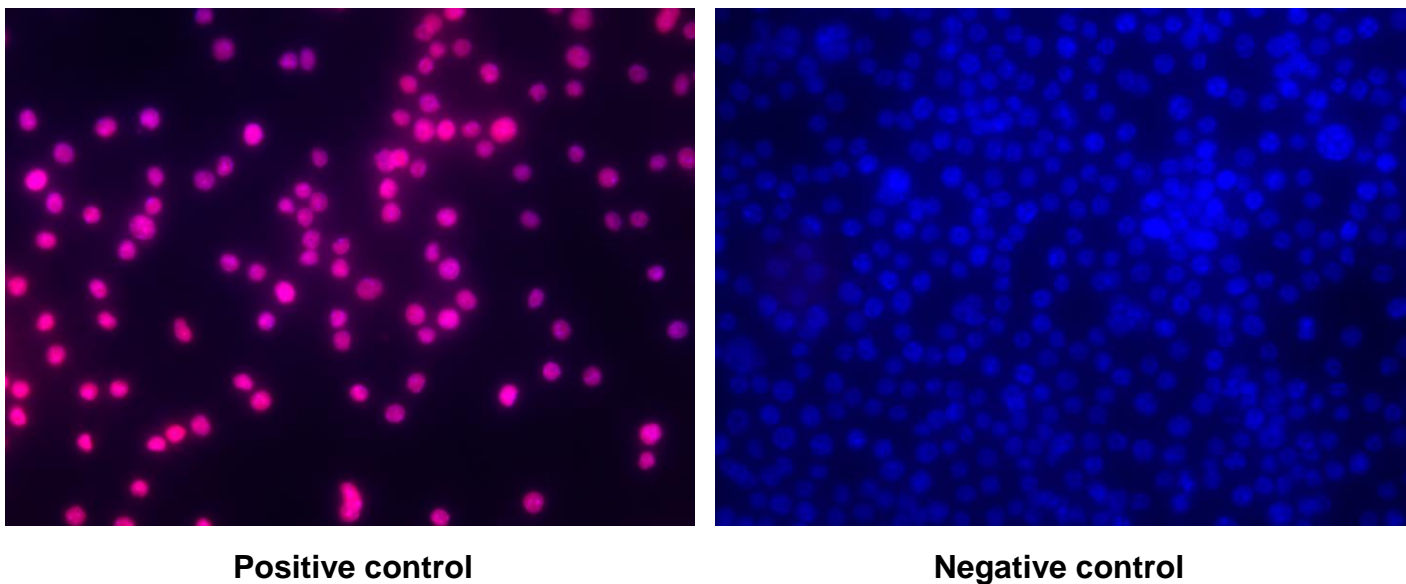

Supplement: s1 [file s1]
