# Supplementary material for: LncRNA 220: A Novel Long Non-Coding RNA Regulates Autophagy and Apoptosis in Kupffer Cells via the miR-5101/PI3K/AKT/mTOR Axis in LPS-Induced Endotoxemic Liver Injury in Mice
Source: MDPI journal article supplement (doi:10.3390/ijms241311210), 2023-07-07
Supplement: s1 [file s1]

**Table S1 Primer sequences of qRT-PCR**

| Gene           | Primer  | Sequence                  |
|----------------|---------|---------------------------|
| 220            | Forward | GGTCAAACCAAGAGTGCCTG      |
|                | Reverse | TCGGTCAGAGGTGTTCTGGT      |
| 18S            | Forward | AGTCCCTGCCCTTTGTACACA     |
|                | Reverse | CGATCCGAGGGCCTCACTA       |
| IL-1 $\beta$   | Forward | TGCCACCTTTTGACAGTGATG     |
|                | Reverse | TGATGTGCTGCTGCGAGATT      |
| IL-6           | Forward | AGACAAAGCCAGAGTCCTTCAG    |
|                | Reverse | TGTGACTCCAGCTTATCTCTTGG   |
| TNF- $\alpha$  | Forward | TAGCCACGTCGTAGCAAAC       |
|                | Reverse | GCAGCCTTGTCCCTTGAAGA      |
| Pik3ca         | Forward | AGGCTCAGGCACTATTCCATT     |
|                | Reverse | TGTGCTGTCTCAACTACGGA      |
| 220 (homo)     | Forward | ATGGCTCAGTGGGTAAGAGC      |
|                | Reverse | CCATGTGGTTGCTGGGATTTG     |
| U6             | Forward | GCTTCGGCAGCACATATACTAAAAT |
|                | Reverse | CGCTTCACGAATTTGCGTGTCA    |
| $\beta$ -actin | Forward | TATAAAACCCGGCGGCGCA       |
|                | Reverse | GTCATCCATGGCGAACTGGTG     |

**Table S2 Primer sequences of RNA pull-down**

| Primer | Sequence                   |
|--------|----------------------------|
| 220-F  | AGAGACAAGGAAACAGGCTCTGA    |
| 220-R  | AAAAGATAAGTAAAGCCAGGGGGTGG |
