# Supplementary material for: LncRNA 220: A Novel Long Non-Coding RNA Regulates Autophagy and Apoptosis in Kupffer Cells via the miR-5101/PI3K/AKT/mTOR Axis in LPS-Induced Endotoxemic Liver Injury in Mice
Source: MDPI journal article supplement (doi:10.3390/ijms241311210), 2023-07-07
Supplement: s1 [file s1]

>TCONS\_00127483 11 5488251-5507220

AGAGACAAGGAAACAGGCTCTGAGAGATTAAGCAACTCATCCCACTTGCTCAACCAGCATATGTGGGAG  
ACCTGACAACCCGCCCTGTGTGGCCGTTTCACAAGCCAACGCCCAGCCACAGGGGACGACTGTTCCCTGG  
GACTGGAAGTGATGAAGAGGAGCCATGATGGTTAAACTTCTTTAAAAAGAAAGAAGACAAACTGGCTTTC  
CTTGATGCCTTTGAACCTGAGTCCAGAAGACTTAGGGACAATGGATAGCTAAAAATTTATTTATATCTGA  
AGTTGGGTGGCAGGGTGCCTCCAGAGGCAGAGGCAGAGGCAGGGGGATCTATCTCCGAGTCTGAGGTC  
AGCCTGGTCTACAGATCGAGTTCCAAGACAGCCAGGGCTACAAAGAAAAATCCTGCCTCAAAAAATGGA  
AAAAACAACAAAAACAACAAAAATACATTAAAAACAACAAAAACAACAAAACTGGATTTATTCTCT  
GCCGCGGCTGGGAGTGGACACCTTTGTTTCAGCAAAATGAACCTTTTCCTGATTGTGCACTTCCAGGCCC  
TGGGCAAGCCGACTCTAGCACTCTGCAAAACCCACCTCCCAAAGGAGGGTTGAACTTCTTGAAACCCT  
TAAAAACTACCAGTGAACCTTCAGGAAGTAACCCACGCAACTCTTTCCCAGAAGAGGTCAATGGTCACAG  
AATCGTAAGAAACACCACTCTGACCCCGGGACTTCCTGCCTCCCACTCGGAACATCTCAAAGTTCAAA  
CTGCTCAGGAACCTGACATCCGGCTGACAGACGGGGAGTGTGCTCAGTGGTAGAGTGCTTTCCTACATC  
GGGAGAGGCCCTGGCTCCTATCTCCAACCTCTGTAAAGAAAAGATTAATACTATGAAACGAAAAATAAACC  
AGGCTTTAAAGAAAAACAAGCATGAGAAGAAGAAATCGCTTTCCTGGGGTCTGGTTCCGTCGTCGTC  
CCCACCCCGCCCCGCCCCCATGACTGAGTCAAAAAGATTTCAATGCAACTGGTCAAACCAAGAGTGCCT  
GCAGAGATCTTGATGTTTTCTTAAAGCCATCAGACAAGAGTACAACAAAGAAATGGGCAGATGTGCTTA  
CTCAGGACCAGAACACCTCTGACCGATTAGCATTCCTCTCTTAACCCCGCCCCCCCCACCCCCCATGT  
AAACAGTTTCACCTCATAAAACCAGGTTTTTTGTTTTTTTAAAAAATATTTGGTTAAGGGGGCTGGTG  
AGATGGCTCAGTGGGTAAAGAGCACCCGACTGCTCTTCCAAAGGTCCGGAGTTCAAATCCCAGCAACCAC  
ATGGTGGCTCACAACCATCCATAACAAGATCTGATGCCCTCTTCCGGAGTGTCTGAAGACAGCTACAGT  
GTAATTACATATAATAAATAAATAAATAAATCTTTAAAAAAAAAATATTTGGTTAAAAACAATAAAAA  
CAAAACAACAAAAACAACAAAAAAGCAGACCAAAATCCAAAAAATCTTGGGCTATCAAGATGGCTCAG  
TGACTAAAATTACCTGTACCAAGCCTGATCCATCCTCAGGTTGACCTTTAACCTCCCACTCACACCT  
GCCATATGTACAGAAACATGCTCTCCAGCACACGCACACGTGCGCGCACACACACAATAAACA  
TAAATGCGATGCATTTTTAGAGAACATTCTCAAAGACACGATAAACCCAGGCTAATACATTTTACTA  
ATTTTTTTTTTTCTGAGACAGGGTTTCACTATGCGGCCCTAGCTGTCCTTAACCTCACTCTGTAGACCA  
GGCTAGCTTTGAACTCAGAAATCTGCCAGCCTCTGCCTCTCCAGTACTGGGACTAAAGGTGTGTGCCAC  
CACCCTGGCTTTACTTATCTTTT
